# Supplementary material for: The Complete Mitochondrial Genome of Mytilisepta virgata (Mollusca: Bivalvia), Novel Gene Rearrangements, and the Phylogenetic Relationships of Mytilidae
Source: MDPI journal article supplement (doi:10.3390/genes14040910), 2023-04-13
Supplement: s1 [file s1]

**Table S1.** List of species analyzed in this study with their GenBank accession numbers.

| Order     | Family    | Species                             | Size (bp) | Accession no. |
|-----------|-----------|-------------------------------------|-----------|---------------|
| Mytiloida | Mytilidae | <i>Bathymodiolus aduloides</i>      | 17243     | MT916741      |
|           |           | <i>Bathymodiolus azoricus</i>       | 17598     | MT916742      |
|           |           | <i>Bathymodiolus brooksi</i>        | 17728     | MT916743      |
|           |           | <i>Gigantidas childressi</i>        | 17637     | MT916744      |
|           |           | <i>Bathymodiolus japonicus</i>      | 17510     | AP014560      |
|           |           | <i>Bathymodiolus sp.</i>            | 18376     | MT916740      |
|           |           | <i>Bathymodiolus septemdierum</i>   | 17069     | AP014562      |
|           |           | <i>Brachidontes exustus</i>         | 16600     | NC_024882     |
|           |           | <i>Crenomytilus grayanus</i>        | 17582     | NC_044128     |
|           |           | <i>Gigantidas haimaensis</i>        | 18283     | MT916746      |
|           |           | <i>Gigantidas platifrons</i>        | 17653     | AP014561      |
|           |           | <i>Gregariella coralliophaga</i>    | 16273     | NC_044129     |
|           |           | <i>Modiolus kurilensis</i>          | 16210     | KY242717      |
|           |           | <i>Modiolus modiolus</i>            | 15816     | NC_033537     |
|           |           | <i>Modiolus nipponicus</i>          | 15638     | NC_044130     |
|           |           | <i>Modiolus philippinarum</i>       | 16389     | NC_035422     |
|           |           | <i>Modiolus comptus</i>             | 15591     | MN602036      |
|           |           | <i>Arcuatula senhousia</i>          | 20612     | NC_014590     |
|           |           | <i>Mytella strigata</i>             | 16302     | NC_056377     |
|           |           | <i>Mytilus californianus</i>        | 16730     | GQ527172      |
|           |           | <i>Mytilus unguiculatus</i>         | 16642     | NC_024733     |
|           |           | <i>Mytilus edulis</i>               | 16745     | MF407676      |
|           |           | <i>Mytilus galloprovincialis</i>    | 16780     | FJ890849      |
|           |           | <i>Mytilus trossulus</i>            | 18628     | HM462080      |
|           |           | <i>Mytilus chilensis</i>            | 16765     | NC_030633     |
|           |           | <i>Perna canaliculus</i>            | 16004     | NC_054242     |
|           |           | <i>Perna perna</i>                  | 16100     | MT588202      |
|           |           | <i>Perna viridis</i>                | 16014     | NC_018362     |
|           |           | <i>Perumytilus purpuratus</i>       | 16986     | MH330333      |
|           |           | <i>Semimytilus patagonicus</i>      | 24347     | MT026713      |
|           |           | <i>Mytilisepta virgata</i>          | 14713     | ON193524      |
|           |           | <i>Mytilisepta keenae</i>           | 15902     | MK721542      |
|           |           | <i>Geukensia demissa</i>            | 15838     | MN449487      |
|           |           | <i>Xenostrobus securis</i>          | 18145     | NC_028706     |
|           |           | <i>Bathymodiolus puteoserpentis</i> | 20482     | NC_068738     |
|           |           | <i>Brachidontes pharaonis</i>       | 20066     | NC_064131     |
|           |           | <i>Gigantidas vrijenhoeki</i>       | 17786     | NC_068739     |
|           |           | <i>Modiolus modulaides</i>          | 15422     | NC_067876     |
| Ostreida  | Pinnidae  | <i>Atrina pectinata</i>             | 16811     | NC_020028     |
|           | Ostreidae | <i>Ostrea lurida</i>                | 16344     | NC_022688     |
|           |           | <i>Ostrea denselamellosa</i>        | 16277     | NC_015231     |
|           |           | <i>Ostrea edulis</i>                | 16320     | JF274008      |
|           |           | <i>Magallana hongkongensis</i>      | 18617     | MZ337404      |
|           |           | <i>Magallana gigas</i>              | 18224     | NC_001276     |
|           |           | <i>Magallana nippona</i>            | 20030     | NC_015248     |
|           |           | <i>Magallana iredalei</i>           | 22446     | NC_013997     |
|           |           | <i>Crassostrea sp.</i>              | 22040     | NC_018763     |
|           |           | <i>Crassostrea virginica</i>        | 17244     | AY905542      |

|            |              |                                  |       |           |
|------------|--------------|----------------------------------|-------|-----------|
|            |              | <i>Magallana belcheri</i>        | 21020 | MH051332  |
|            |              | <i>Saccostrea</i> sp.            | 16285 | KU310921  |
|            |              | <i>Saccostrea cucullata</i>      | 16396 | NC_027724 |
|            |              | <i>Saccostrea kegaki</i>         | 16260 | NC_030533 |
|            |              | <i>Saccostrea echinata</i>       | 16281 | NC_036478 |
|            |              | <i>Saccostrea glomerata</i>      | 16282 | NC_036483 |
|            |              | <i>Saccostrea mordax</i>         | 16532 | NC_013998 |
|            |              | <i>Saccostrea mytiloides</i>     | 16282 | NC_036479 |
|            | Margaritidae | <i>Pinctada imbricata</i>        | 31435 | KX669229  |
|            |              | <i>Pinctada maxima</i>           | 16994 | GQ452847  |
|            | Pteriidae    | <i>Pteria penguin</i>            | 17344 | KU552127  |
| Pectinida  | Pectinidae   | <i>Argopecten purpuratus</i>     | 16270 | NC_027943 |
|            |              | <i>Argopecten irradians</i>      | 16211 | NC_009687 |
|            |              | <i>Mimachlamys crassicostata</i> | 17963 | NC_011608 |
|            |              | <i>Placopecten magellanicus</i>  | 32115 | NC_007234 |
|            |              | <i>Mimachlamys sanguinea</i>     | 17383 | KF214684  |
|            |              | <i>Amusium pleuronectes</i>      | 18044 | MT419374  |
|            |              | <i>Argopecten ventricosus</i>    | 16079 | KT161261  |
| Arcoida    | Arcidae      | <i>Anadara sativa</i>            | 48161 | NC_024927 |
|            |              | <i>Anadara kagoshimensis</i>     | 46713 | KF750628  |
|            |              | <i>Tegillarca granosa</i>        | 31589 | NC_026081 |
|            |              | <i>Anadara vellicata</i>         | 34147 | KP954700  |
|            | Cucullaeidae | <i>Cucullaea labiata</i>         | 25845 | KP091889  |
| Adapedonta | Hiatellidae  | <i>Panopea globosa</i>           | 15469 | NC_025636 |
|            |              | <i>Panopea abrupta</i>           | 15381 | NC_033538 |
